# Supplementary material for: A heteropolyacid-based ionic liquid immobilized onto magnetic fibrous nano-silica as robust and recyclable heterogeneous catalysts for the synthesis of tetrahydrodipyrazolopyridines in water
Source: Royal Society of Chemistry journal article supplement (doi:10.1039/c6ra15766a), 2016-01-01
Supplement: c6ra15766a1.pdf [file c6ra15766a1.pdf]

## A heteropolyacid-based ionic liquid immobilized onto magnetic fibrous nano-silica as robust and recyclable heterogeneous catalysts for the synthesis of tetrahydrodipyrzolo-pyridines in water

Seyed Mohsen Sadeghzadeh

Department of Chemistry, College of Sciences, Sina Masihabadi Student Research, P.O. Box 97175-615, Neishabour, Iran. Fax/Tel: +98 561 2502065; E-mail: [seyedmohsen.sadeghzadeh@gmail.com](mailto:seyedmohsen.sadeghzadeh@gmail.com)

**Table S1** Comparison of the catalytic efficiency of Fe<sub>3</sub>O<sub>4</sub>/SiO<sub>2</sub>/KCC-1/SO<sub>4</sub>H MNPs with various catalysts.

| Entry | Catalyst                                              | Solvent               | Amount catalyst (mol%) | T (°C) | Time (h) | Yield (%) <sup>a</sup> |
|-------|-------------------------------------------------------|-----------------------|------------------------|--------|----------|------------------------|
| 1     | ZnCl <sub>2</sub>                                     | EtOH                  | 10                     | Reflux | 5        | 88 [51]                |
| 2     | FeCl <sub>3</sub>                                     | EtOH                  | 10                     | Reflux | 5        | 85 [51]                |
| 3     | MgCl <sub>2</sub>                                     | EtOH                  | 10                     | Reflux | 5        | 84 [51]                |
| 4     | Yb(OTf) <sub>3</sub>                                  | EtOH                  | 5                      | Reflux | 3        | 90 [51]                |
| 5     | Cu(ClO <sub>4</sub> ) <sub>2</sub> ·6H <sub>2</sub> O | EtOH                  | 5                      | Reflux | 3        | 90 [51]                |
| 6     | Vitamin B1                                            | EtOH                  | 5                      | Reflux | 4        | 88 [51]                |
| 7     | TsOH                                                  | EtOH                  | 10                     | Reflux | 4        | 88 [51]                |
| 8     | NH <sub>2</sub> SO <sub>3</sub> H                     | EtOH                  | 10                     | Reflux | 4        | 86 [51]                |
| 9     | -                                                     | EtOH                  | -                      | Reflux | 5        | 79 [52]                |
| 10    | -                                                     | H <sub>2</sub> O/EtOH | -                      | Reflux | 6        | 40 [52]                |
| 11    | -                                                     | [Hmim]TFA             | -                      | Reflux | 12       | 60 [52]                |
| 12    | p-TSA                                                 | H <sub>2</sub> O      | - <sup>b</sup>         | Reflux | 6        | 36 [52]                |
| 13    | K <sub>2</sub> CO <sub>3</sub>                        | H <sub>2</sub> O      | - <sup>b</sup>         | Reflux | 9        | 68 [52]                |
| 14    | Piperidine                                            | H <sub>2</sub> O      | - <sup>b</sup>         | Reflux | 9        | 43 [52]                |
| 15    | Fe <sub>3</sub> O <sub>4</sub> /KCC-1/IL/HPW          | H <sub>2</sub> O      | 0.4                    | r.t.   | 0.5      | 96 [52]                |

<sup>a</sup> Reaction conditions: benzaldehyde (1 mmol), phenylacetylene (1 mmol), 1H-benzo[d]imidazol-2-amine (1 mmol) in different amounts of catalyst, temperature, and time.

<sup>b</sup> The amount of catalyst is not mentioned in the article.
